# Supplementary material
Source: MDPI journal article supplement (https://www.mdpi.com/2073-4395/12/6/1385)
Supplement: s1 [file s1]

# QUESTIONNAIRE

## Section 1— Consumption Habits

Q1.0. Country:

- ☐ Portugal ☐ Turkey

Q1.1. Are you familiar with the concept of organic farming, which aims to use safe techniques without harming natural resources and without using chemicals?

- ☐ Yes ☐ No

Q1.2. Do you consume food produced from organic farming?

- ☐ Yes ☐ No

Q1.3. If yes, how many times a week?

- ☐ Every meal ☐ Between 4 and 7 ☐ Between 2 and 3 meals ☐ One meal

Q1.4. What products do you consume, taking into account the way they are produced?

(Choose one or two columns: CA = Conventional Agriculture, OF = Organic Farming, CLP = Conventional Livestock Production, OLP = Organic Livestock Production, AQ = Aquaculture, WC = Wild Capture)

| Vegetables                | CA | OF | Fruits                     | CA        | OF        | Meats                         | CLP        | OLP        |
|---------------------------|----|----|----------------------------|-----------|-----------|-------------------------------|------------|------------|
| Chickpea                  |    |    | Apple                      |           |           | Rabbit                        |            |            |
| Green Pea                 |    |    | Orange                     |           |           | Pork <sup>PT</sup>            |            |            |
| Broad Beans <sup>PT</sup> |    |    | Pear                       |           |           | Chicken                       |            |            |
| Beans                     |    |    | Banana                     |           |           | Turkey                        |            |            |
| Lentils                   |    |    | Blueberry                  |           |           | Goatling                      |            |            |
| Pumpkin                   |    |    | Raspberry                  |           |           | Wild boar <sup>PT</sup>       |            |            |
| Eggplant                  |    |    | Strawberry                 |           |           | Piglet <sup>PT</sup>          |            |            |
| Broccoli                  |    |    | Pineapple                  |           |           | Sheep                         |            |            |
| Tomatoes                  |    |    | Persimmon                  |           |           | Cow                           |            |            |
| Lettuce                   |    |    | Plum                       |           |           | <b>Milk &amp; Derivatives</b> | <b>CLP</b> | <b>OLP</b> |
| Bell pepper               |    |    | <b>Fish</b>                | <b>AQ</b> | <b>WC</b> | Milk                          |            |            |
| Cucumber                  |    |    | Sea bass                   |           |           | Cheese                        |            |            |
| Potatoes                  |    |    | Sardine                    |           |           | Fresh Cheese <sup>PT</sup>    |            |            |
| Parsley                   |    |    | Hake <sup>PT</sup>         |           |           | Butter                        |            |            |
| Savoy Cabbage             |    |    | Anchovy <sup>TR</sup>      |           |           | Margarines                    |            |            |
| Onion                     |    |    | Gilthead seabream          |           |           | Cream                         |            |            |
| Chuchu <sup>PT</sup>      |    |    | Tuna fish                  |           |           | Yogurt                        |            |            |
| Turnip                    |    |    | Codfish <sup>PT</sup>      |           |           | Eggs                          |            |            |
| Cauliflower               |    |    | Whiting fish <sup>TR</sup> |           |           |                               |            |            |
| Spinach                   |    |    | Bonito Fish <sup>TR</sup>  |           |           |                               |            |            |
| Asparagus                 |    |    |                            |           |           |                               |            |            |
| Green Cabbage             |    |    |                            |           |           |                               |            |            |
| Watercress                |    |    |                            |           |           |                               |            |            |
| Beet                      |    |    |                            |           |           |                               |            |            |
| Carrot                    |    |    |                            |           |           |                               |            |            |
| Arugula                   |    |    |                            |           |           |                               |            |            |

<sup>PT</sup>Only in Portuguese version, <sup>TR</sup>Only in Turkish version

## Section 2— Determinants of consumption

Q.2.1. What are the reasons that lead you to consume organic farming products?

(from 1: *Very Important* to 6: *Not Important*)

|                                                      | 1 | 2 | 3 | 4 | 5 | 6 |
|------------------------------------------------------|---|---|---|---|---|---|
| They are more appealing in terms of flavor and aroma |   |   |   |   |   |   |
| Their production does not use pesticides             |   |   |   |   |   |   |
| They can bring benefits for the human health         |   |   |   |   |   |   |
| They are less pollutant for the environment          |   |   |   |   |   |   |
| They help local farmers                              |   |   |   |   |   |   |
| They are more nutritious                             |   |   |   |   |   |   |

Q.2.2. If not, what is(are) the reason(s) that lead you not to consume organic farming products?

(you may choose more than one answer)

- ☐ Because their price is generally more expensive than conventional food.
- ☐ Because they are the same as those produced in a conventional way.
- ☐ Because they are not on sale near where I live.
- ☐ Because they are not on sale near my workplace.
- ☐ Because I am not informed about sustainable products.
- ☐ Because these products look less beautiful.
- ☐ Because I do not think they meet all food safety standards.

## Section 3— Commercialisation

Q.3.1. Where do you buy organically produced food?

(you may choose more than one answer)

- ☐ Physical store, supermarket and hypermarket
- ☐ Local grocery store
- ☐ Online, with commercial platforms
- ☐ Organic store
- ☐ Going directly and in person to the producer
- ☐ Online, with the producer's platform

Q.3.2. Is this location close to your home/workplace or other daily activities?

- ☐ Yes
- ☐ No

Q.3.3. In your opinion, are there few organic food selling places?

- ☐ Yes
- ☐ No

Q.3.4. How much would you be willing to pay extra for a product (in kilograms), if it is produced organically?

*Portuguese version*

- ☐ Up to 1 €
- ☐ Between 1 € and 2 €
- ☐ More than 2 €

*Turkish version*

- ☐ Up to 10 TL
- ☐ Between 10 TL and 20 TL
- ☐ More than 20 TL

#### Section 4— Environmental and Social Impact:

On a scale from 1 to 5 where 1= Completely Disagree, 5= Completely Agree

|                                                                                          | 1 | 2 | 3 | 4 | 5 |
|------------------------------------------------------------------------------------------|---|---|---|---|---|
| Q.4.1. Organic farming is more environmentally friendly compared to conventional farming |   |   |   |   |   |
| Q.4.2. Natural fertilisers are not used in organic farming                               |   |   |   |   |   |
| Q.4.3. Organic farming does not contribute to reducing the ecological footprint          |   |   |   |   |   |
| Q.4.4. Organic farming does not use harmful pesticides                                   |   |   |   |   |   |
| Q.4.5. This mode of agriculture is underdeveloped in my country                          |   |   |   |   |   |
| Q.4.6. Organically obtained foods are valued by society                                  |   |   |   |   |   |
| Q.4.7. Pesticides do not contribute to environmental pollution                           |   |   |   |   |   |

#### Section 5— Pandemic versus Sustainable Products:

Q.5.1. In your opinion, do you think society has started to give more value to local products and products from organic farming?

- ☐ Yes ☐ No

Q.5.2. In your opinion, do you believe that due to the new Coronavirus, the consumption of these products has increased?

- ☐ Yes ☐ No ☐ I don't know

#### Section 6— Demographic Data:

Q.6.1. Age\_\_\_\_\_years

Q.6.2. Gender:

- ☐ Female ☐ Male

Q.6.3. Place where you live?

- ☐ Urban environment ☐ Countryside

Q.6.4. City:\_\_\_\_\_

Q.6.5. Qualifications;

*Portuguese version*

- ☐ First cycle (4 school years)  
☐ Second cycle (6 school years)  
☐ Third cycle (9 school years)  
☐ Secondary school (12 school years)  
☐ University

*Turkish version*

- ☐ Elementary school (5 school years)  
☐ Middle school (8 school years)  
☐ Secondary school (12 school years)  
☐ University

Q.6.6. Professional Activity;

- ☐ Unemployed ☐ Student ☐ Retired

Employed in the following area:

- ☐ Health ☐ Food Industry ☐ Agriculture ☐ Nutrition ☐ Other areas

Q.6.7 Monthly household income

*Portuguese version*

- ☐ Less than 500 €
- ☐ From 500 € to 1000 €
- ☐ From 1000 € to 1500 €
- ☐ From 1500 € to 2000 €
- ☐ From 2000 € to 3000 €
- ☐ From 3000 € to 4000 €
- ☐ From 4000 € to 5000 €
- ☐ More than 5000 €

*Turkish version*

- ☐ Less than 2000 TRY
- ☐ From 2000 TRY to 2500 TRY
- ☐ From 2500 TRY to 3500 TRY
- ☐ From 3500 TRY to 4500 TRY
- ☐ From 4500 TRY to 5500 TRY
- ☐ From 5500 TRY to 6000 TRY
- ☐ From 6000 TRY to 7000 TRY
- ☐ More than 7000 TRY
